# Supplementary material for: Phylogeny of Echinoderm Hemoglobins
Source: PubMed Central journal article supplement (PMC4527676; doi:10.1371/journal.pone.0129668), 2015-08-06

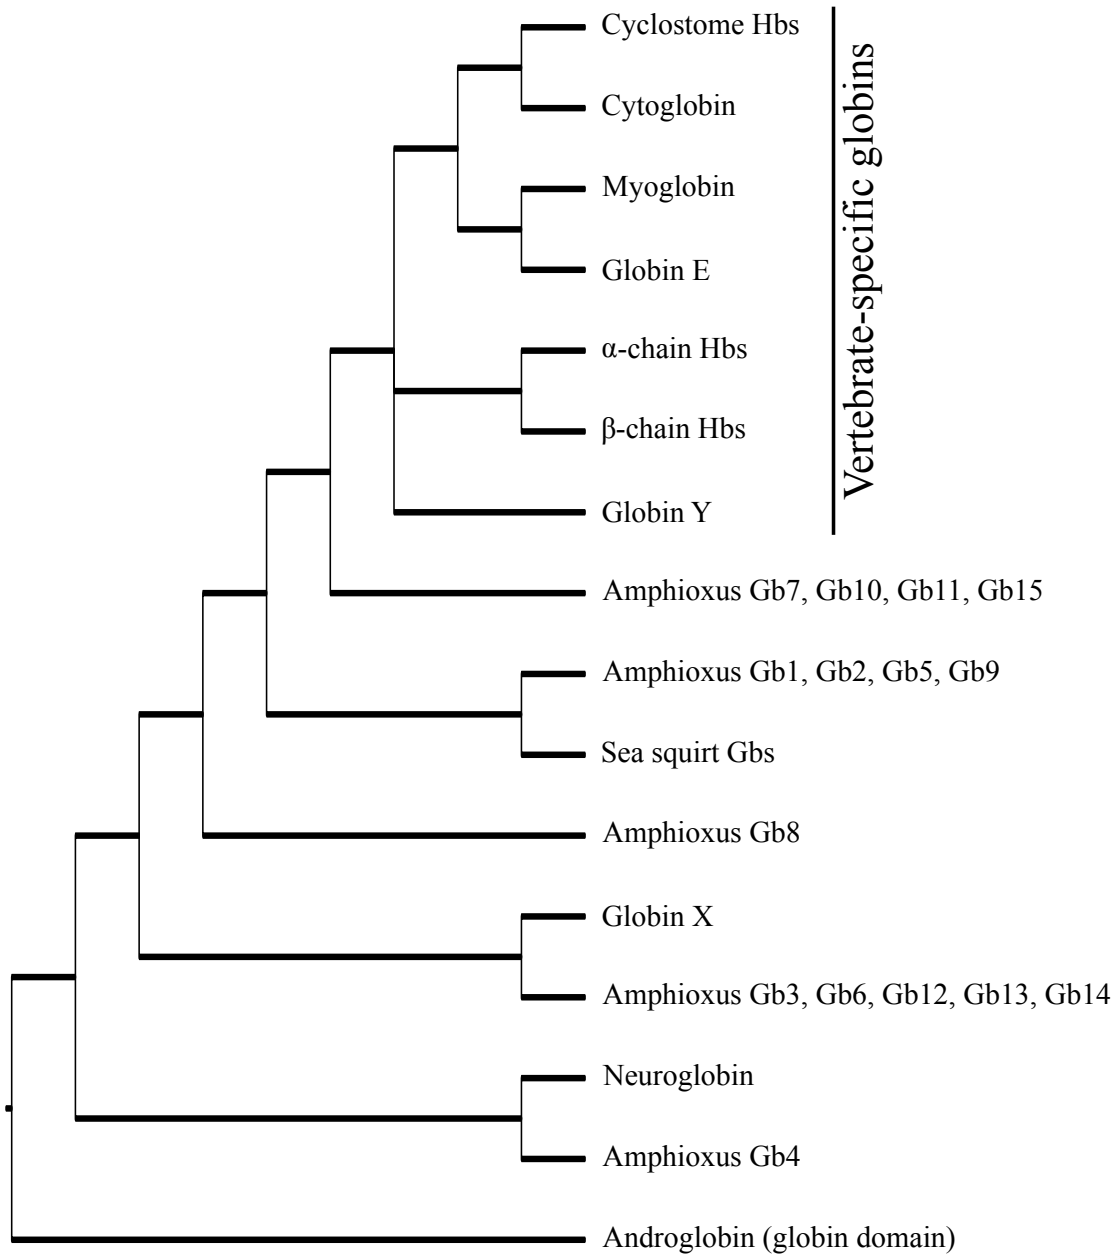

Supplement: pone.0129668.s003.pdf [file pone.0129668.s003.pdf]
